# Supplementary material for: Efficient discrimination against RNA-containing primers by human DNA polymerase ε
Source: PubMed Central journal article supplement (PMC9205888; doi:10.1038/s41598-022-14602-2), 2022-06-17

**SUPPLEMENTAL INFORMATION**

**for the article**

**Efficient discrimination against RNA-containing primers by human DNA polymerase  $\epsilon$**

Alisa E. Lisova, Andrey G. Baranovskiy, Lucia M. Morstadt, Nigar D. Babayeva, Tahir H.  
Tahirov

Tahir H. Tahirov

Email: [ttahirov@unmc.edu](mailto:ttahirov@unmc.edu)

**Table S1. Oligonucleotides used in this study**

| Sequence                                              | Description       | Application     | Length |
|-------------------------------------------------------|-------------------|-----------------|--------|
| 5'-AATGTTTCTAGGCAGCTCGGAGTCC <sup>a</sup>             | Template (DNA)    | kinetic studies | 25     |
| 5'-/Cy3/GGACTCCGAGCTGCC (D15)                         | Primer (DNA)      |                 | 15     |
| 5'-/Cy3/ <u>GGACTCCGAGCTGCC</u> <sup>b</sup> (D14-R1) | Primer (chimeric) |                 | 15     |
| 5'-/Cy3/GGACUCCGAGCUGCC (R15)                         | Primer (RNA)      |                 | 15     |
| 5'-/Cy3/GGACUCCGAGCUGCC (R14-D1)                      | Primer (chimeric) |                 | 15     |
| 5'-/Cy3/GGACUCCGAGCUGCC (R12-D3)                      | Primer (chimeric) |                 | 15     |
| 5'-/Cy3/GGACUCCGAGCTGCC (R10-D5)                      | Primer (chimeric) |                 | 15     |
| 5'-/Cy3/GGACUCCG <u>AGCTGCC</u> (R8-D7)               | Primer (chimeric) |                 | 15     |
| 5'-/BiotinTEG/AATACATAAGCGCTCCAGGCAAT                 | Template (DNA)    | Octet K2        | 23     |
| 5'-GCCUGGAGCGC (R11)                                  | Primer (RNA)      |                 | 11     |
| 5'-GCCUGGAGCG/ <u>ddC</u> / (R10-D1)                  | Primer (chimeric) |                 | 11     |
| 5'-GCCUGGAG <u>CG/ddC</u> / (R8-D3)                   | Primer (chimeric) |                 | 11     |
| 5'-GCCUGGAG <u>CG/ddC</u> / (R6-D5)                   | Primer (chimeric) |                 | 11     |
| 5'-GCCUGGAG <u>CG/ddC</u> / (R4-D7)                   | Primer (chimeric) |                 | 11     |
| 5'-GCCTGGAGCG/3ddC/ (D11)                             | Primer (DNA)      |                 | 11     |
| 5'-GCCTGGAGCG/3dC/ (D10-R1)                           | Primer (chimeric) |                 | 11     |
| 5'-ATTATGGCAGCTCGGAGTCC                               | Template (DNA)    | EMSA            | 20     |
| 5'-/Cy3/GGACTCCGAGCTGCC (D15)                         | Primer (DNA)      |                 | 15     |

<sup>a</sup> The template regions complementary to a primer are in italics.

<sup>b</sup> Deoxy- and dideoxy- nucleotides in the chimeric primer sequences are underlined.

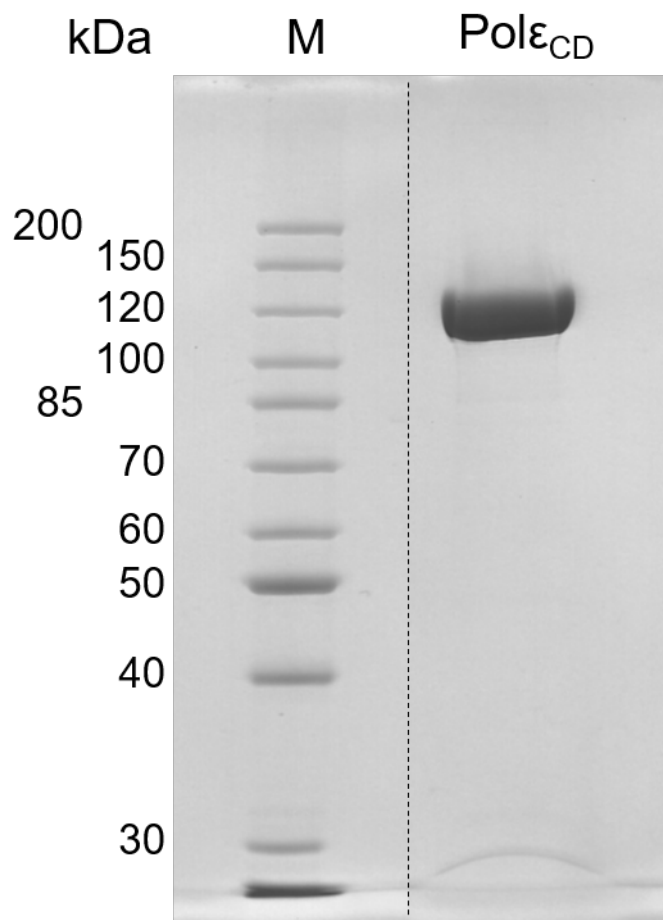

**Figure S1. Analysis of hPol<sub>ε</sub><sub>CD</sub> purity.** Proteins were separated by 8% SDS-PAGE and stained by Coomassie Brilliant Blue R-250. M – molecular weight markers. The dashed line indicates splicing of the original image.



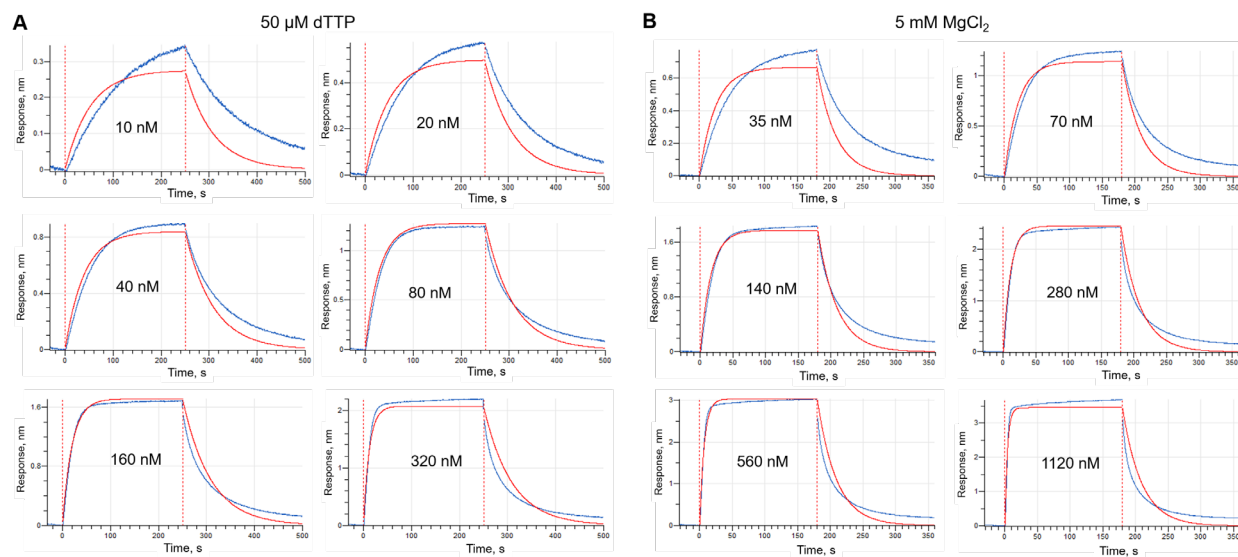

**Figure S3. Kinetics of hPol $\epsilon$ CD/DNA complex formation and dissociation in the presence of 50  $\mu$ M dTTP (A) or 5 mM MgCl $_2$  (B).** Binding studies were conducted in the buffer containing 30 mM Tris-Hepes, pH 7.8, 100 mM NaCl, 2 mM TCEP, and 0.002% Tween 20. Enzyme concentration is indicated on each graph. DNA is attached to the streptavidin coated biosensor (SAX, Sartorius AG). Each binding cycle consists of next steps: baseline, association, and dissociation. The blue line depicts the actual binding curve. The red line represents the model curve build by the Data Analysis HT software (Sartorius AG) with use of global fitting.

**Fig. 1.**

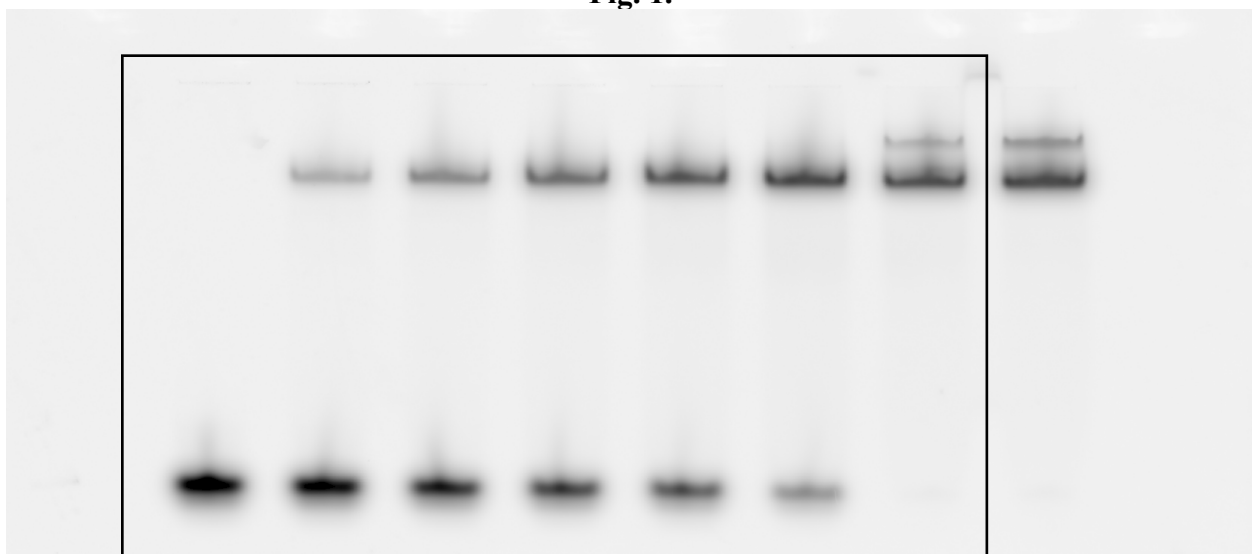

**Supp. Fig. S1.**

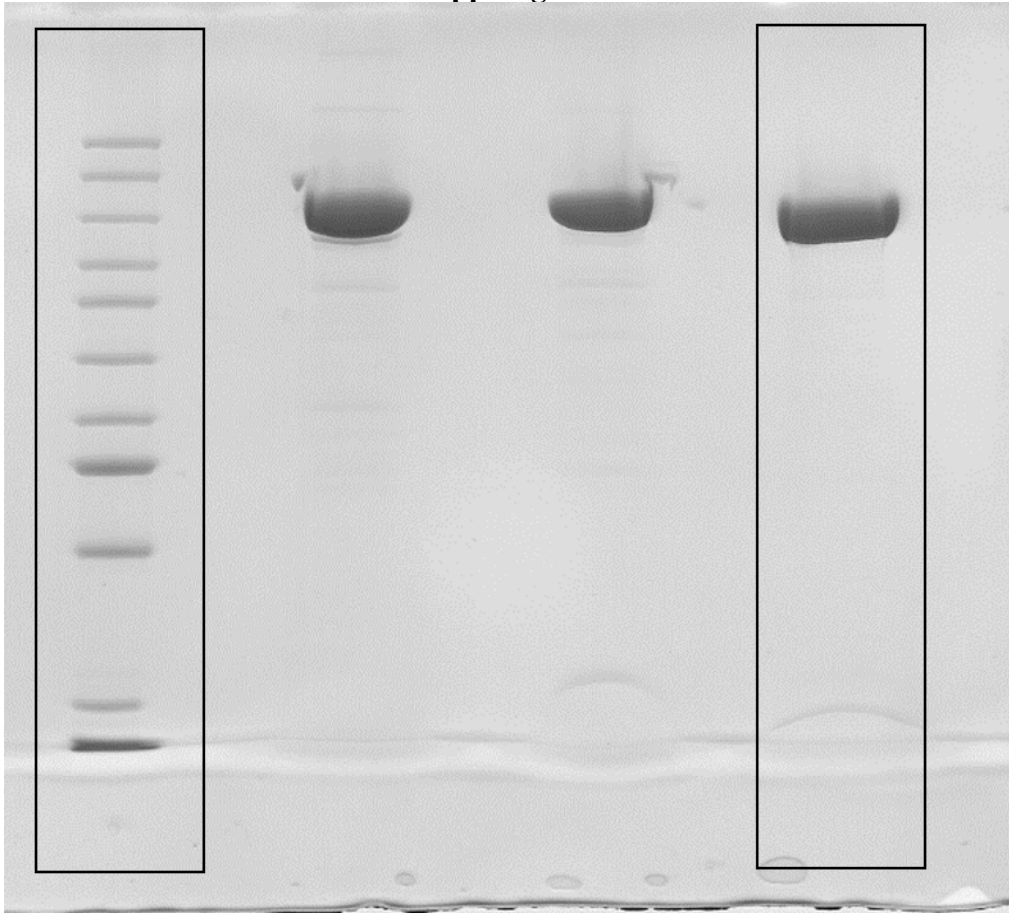

Supplement: 41598_2022_14602_MOESM1_ESM.pdf [file 41598_2022_14602_MOESM1_ESM.pdf]
